# Supplementary material for: Comparison of Body Scanner and Manual Anthropometric Measurements of Body Shape: A Systematic Review
Source: MDPI journal article supplement (doi:10.3390/ijerph18126213), 2021-06-08
Supplement: s1 [file s1]

**Table S1.** Data related to the measurement process.

| Reference                        | Measurement techniques used                                  | Person in charge of measuring | Clothing                                                               | Position                                                          | Number of times measured                            | Measures                                      |
|----------------------------------|--------------------------------------------------------------|-------------------------------|------------------------------------------------------------------------|-------------------------------------------------------------------|-----------------------------------------------------|-----------------------------------------------|
| Bragança et al., 2018 [4]        | 3D scanner and conventional anthropometry.                   | Certified anthropometrist     | Underwear.                                                             | Standing stationary.                                              | 2 with each technique                               | Circumferences, widths and lengths.           |
| Adler et al., 2017 [17]          | 3D scanner and ADP.                                          | -                             | Underwear and bathing cap.                                             | -                                                                 | 3 DPS: 3 scanners in 3 different postures<br>ADP: 2 | Body volume and %body fat.                    |
| Bourgeois et al., 2017 [18]      | 3D scanner, conventional anthropometry, DXA and ADP.         | Trained personnel             | Tight-fitting clothes.<br>DXA: underwear and examination gown.         | -                                                                 | Weight and size: 2 times<br>Circumferences: 3 times | Circumferences and total body volume.         |
| Medina-Inojosa et al., 2016 [10] | 3D scanner and conventional anthropometry.                   | Previously trained students   | No shoes, tight gray underwear and bathing cap.                        | Anatomically immobile standing position at the end of expiration. | -                                                   | Weight, height and circumferences.            |
| Ng et al., 2016 [11]             | 3D scanner, DXA, ADP and conventional anthropometry.         | -                             | Tight-fitting underwear and bathing cap.<br>DXA: gown, no shoes.       | -                                                                 | 1 with each technique                               | Circumferences and volumes.                   |
| Ng et al., 2019 [20]             | 3D scanner and DXA.                                          | -                             | Tight-fitting clothes.                                                 | Standard position.                                                | 2 with each technique                               | Total body mass, total and regional body fat. |
| Brooke-Wavell et al., 1994 [9]   | 3D scanner and conventional anthropometry.                   | Two experienced observers     | -                                                                      | As upright and still as possible.                                 | 2 with each technique                               | Circumferences.                               |
| Weiss et al., 2009 [21]          | 3D scanner and conventional anthropometry.                   | Trained researchers           | -                                                                      | -                                                                 | 2 with each technique                               | Circumferences.                               |
| Pepper et al., 2010 [15]         | Three-dimensional 3D scanner and conventional anthropometry. | -                             | Scanner: tight-fitting white underwear, eyes protected by a blindfold. | Legs and arms slightly abducted to minimize occlusion.            | Anthropometry: 1 time<br>Scanner: 2 times           | Weight, size and circumferences.              |

|                                 |                                                                                           |                           |                                                                                         |                                                                                |                               |                                               |
|---------------------------------|-------------------------------------------------------------------------------------------|---------------------------|-----------------------------------------------------------------------------------------|--------------------------------------------------------------------------------|-------------------------------|-----------------------------------------------|
| Harbin et al., 2017 [29]        | 3D scanner, hydrostatic weighing, electrical bioimpedance and conventional anthropometry. | -                         | -                                                                                       | 3D scanner: upright with feet forward, arms at a 45-degree angle to the torso. | Hydrostatic weighing: 3 times | Body mass and %body fat.                      |
| Bragança et al., 2017 [3]       | 3D scanner and conventional anthropometry.                                                | -                         | Tight-fitting clothes.                                                                  | Contained breathing.                                                           | 5 times each technique        | Circumferences, widths and lengths.           |
| Vonk & Daanen, 2015 [16]        | 3D scanner and conventional anthropometry.                                                | Students                  | Underwear. Tight-fitting shorts allowed.                                                | Standing, leg extended and elbows slightly bent.                               | 2 with each scanner           | Circumferences.                               |
| Tinsley et al., 2019 [19]       | 4 3D scanners, DXA and ADP.                                                               | -                         | 3 DO scanners and ADP: compression shorts and bathing cap. DXA: lightweight sportswear. | -                                                                              | 2 with each scanner           | Circumferences and total body volume.         |
| Ladouceur et al., 2017 [13]     | 3D scanner and conventional anthropometry.                                                | -                         | Tight-fitting white underwear.                                                          | 3D scanner: still and posture (measure height).                                | 3 with each technique         | Circumferences, widths and depth.             |
| Ramos-Jiménez et al., 2018 [14] | 3D scanner and conventional anthropometry.                                                | Certified Anthropometrist | Tight-fitting swimsuit and cap.                                                         | -                                                                              | -                             | Circumferences.                               |
| Kuehnepfel et al., 2016 [23]    | 3D scanner and conventional anthropometry.                                                | -                         | Underwear and socks.                                                                    | Upright and relaxed.                                                           | 3 with each technique         | Circumferences: arm, waist, hip, thigh, calf. |
| Koepke et al., 2017 [12]        | 3D scanner and conventional anthropometry.                                                | Trained anthropometrists  | Tight-fitting underwear (+3D cap).                                                      | Standing, relaxed.                                                             | 2 with each technique         | Circumferences.                               |
| Lu & Wang., 2010 [22]           | 3D scanner and conventional anthropometry.                                                | Trained personnel         | Scanning suit and a cap.                                                                | Standing and holding their breath.                                             | 3 with each technique         | Circumferences.                               |
